# Supplementary material for: Key bacterial families (Clostridiaceae, Erysipelotrichaceae and Bacteroidaceae) are related to the digestion of protein and energy in dogs
Source: PeerJ. 2017 Mar 2;5:e3019. doi: 10.7717/peerj.3019 (PMC5337088; doi:10.7717/peerj.3019)
Supplement: Supplemental Information 1 [file peerj-05-3019-s001.xlsx]

## Sheet: Supplementary Data 1
Diet	Time point	DM%	Crude Protein% (DM)	Crude Fat% (DM)	Crude Fibre% (DM)	Crude Ash%	CHO% (DM) by diff	Gross Energy (kj/g DM)
Kibble	3	93.03	29.78	27.09	2.58	5.91	34.64	24.19
Kibble	3	93.03	29.78	27.09	2.58	5.91	34.64	24.19
Kibble	3	93.03	29.78	27.09	2.58	5.91	34.64	24.19
Kibble	3	93.03	29.78	27.09	2.58	5.91	34.64	24.19
Meat	3	24.13	81.22	13.83	0.72	4	0.23	24.25
Meat	3	24.13	81.22	13.83	0.72	4	0.23	24.25
Meat	3	24.13	81.22	13.83	0.72	4	0.23	24.25
Meat	3	24.13	81.22	13.83	0.72	4	0.23	24.25
Kibble	6	91.61	29.06	26.27	2.07	6	36.6	23.27
Kibble	6	91.61	29.06	26.27	2.07	6	36.6	23.27
Kibble	6	91.61	29.06	26.27	2.07	6	36.6	23.27
Kibble	6	91.61	29.06	26.27	2.07	6	36.6	23.27
Meat	6	25.84	71.09	22.74	0.64	4.7	0.83	25.93
Meat	6	25.84	71.09	22.74	0.64	4.7	0.83	25.93
Meat	6	25.84	71.09	22.74	0.64	4.7	0.83	25.93
Kibble	9	89.93	30.8	28.02	2.48	6.2	32.5	24.02
Kibble	9	89.93	30.8	28.02	2.48	6.2	32.5	24.02
Kibble	9	89.93	30.8	28.02	2.48	6.2	32.5	24.02
Kibble	9	89.93	30.8	28.02	2.48	6.2	32.5	24.02
Kibble	9	89.93	30.8	28.02	2.48	6.2	32.5	24.02
Meat	9	24.0783	76.63	17.17	0.52	5	0.68	25.75
Meat	9	24.0783	76.63	17.17	0.52	5	0.68	25.75
Meat	9	24.0783	76.63	17.17	0.52	5	0.68	25.75
Meat	9	24.0783	76.63	17.17	0.52	5	0.68	25.75

## Sheet: Supplementary Data 2 Genera
	Kibble						Meat
	3		6		9		3		6		9		P-value
Genus	Mean	SEM	Mean	SEM	Mean	SEM	Mean	SEM	Mean	SEM	Mean	SEM	Diet	Time	Diet * Time
Bacteria;Firmicutes;Clostridia;Clostridiales;Clostridiaceae;Other	0.181797	0.11554	0.0812168	0.0280875	0.0373221	0.00853567	2.5117	0.627205	6.56945	1.81233	3.80521	0.937724	4.21512e-10	0.104918	0.00161217
Bacteria;Firmicutes;Clostridia;Clostridiales;Clostridiaceae;Clostridium	0.191091	0.11546	0.103112	0.051647	0.0605575	0.0135958	3.39611	0.795494	10.675	3.2187	6.10259	1.5254	7.1182e-10	0.0408179	0.000577966
Bacteria;Actinobacteria;Actinobacteria;Coriobacteriales;Coriobacteriaceae;Olsenella	0	0	0	0	0	0	0.00327952	0.00165788	0.0295706	0.00570363	0.0188402	0.00519568	9.3848e-07	4.72326e-05	1.24821e-07
Bacteria;Firmicutes;Clostridia;Clostridiales;Ruminococcaceae;Faecalibacterium	4.35914	1.38377	10.5457	2.5988	5.30104	1.75918	0.0712775	0.0368618	0.0224366	0.01001	0.00906535	0.0050737	1.77657e-06	0.00434626	0.00358957
Bacteria;Fusobacteria;Fusobacteria;Fusobacteriales;Fusobacteriaceae;Fusobacterium	3.96404	1.37685	3.6272	0.930689	6.71445	1.72192	14.6358	2.57397	12.8376	6.2077	11.2862	2.96653	2.74771e-06	0.755655	0.521894
Bacteria;Firmicutes;Erysipelotrichi;Erysipelotrichales;Erysipelotrichaceae;Other	0.190289	0.0340267	0.182658	0.0218771	0.198998	0.0467082	0.0460814	0.015324	0.0572509	0.0274502	0.0318105	0.0174992	5.57858e-06	0.0730079	0.694501
Bacteria;Actinobacteria;Actinobacteria;Coriobacteriales;Coriobacteriaceae;Slackia	0.182133	0.0294119	0.100024	0.0273187	0.114663	0.0258925	1.03728	0.316306	0.742291	0.179256	0.492685	0.0599584	8.18624e-06	0.0033418	0.0179378
Bacteria;Firmicutes;Clostridia;Clostridiales;Peptococcaceae;Peptococcus	0.553136	0.25222	0.332764	0.126002	0.62872	0.160151	2.23401	0.437448	2.78483	1.0815	1.61022	0.484955	1.59058e-05	0.0985136	0.0277692
Bacteria;Actinobacteria;Actinobacteria;Coriobacteriales;Coriobacteriaceae;Other	0.0504405	0.0128283	0.0272937	0.0103572	0.0377296	0.0121987	0.340096	0.110708	0.216074	0.112297	0.258269	0.0613814	3.77465e-05	0.00611155	0.0370414
Bacteria;Firmicutes;Clostridia;Clostridiales;Incertae Sedis XIII;Mogibacterium	0	0	0	0	0	0	0.00777608	0.00281928	0.0134319	0.00523777	0.039721	0.0129146	4.90822e-05	0.000723413	0.000383538
Bacteria;Actinobacteria;Actinobacteria;Coriobacteriales;Coriobacteriaceae;Collinsella	0.805597	0.132063	0.501944	0.128462	0.694453	0.133781	3.88992	1.05734	1.44824	0.552619	2.41705	0.366744	7.00708e-05	0.00137197	0.00344174
Bacteria;Firmicutes;Erysipelotrichi;Erysipelotrichales;Erysipelotrichaceae;Allobaculum	1.67516	0.279558	1.33542	0.266617	1.16268	0.288395	0.334845	0.0774442	0.780187	0.3038	0.216221	0.0655298	9.23012e-05	0.256437	0.00529865
Bacteria;Firmicutes;Clostridia;Clostridiales;Eubacteriaceae;Eubacterium	0.227205	0.0693926	0.414532	0.136453	0.257009	0.0797086	0.0265179	0.0126391	0.0482633	0.0258354	0.0281476	0.0112285	0.000145555	0.000578921	0.699511
Bacteria;Bacteroidetes;Bacteroidia;Bacteroidales;Bacteroidaceae;Bacteroides	6.53077	1.44272	13.7886	1.82389	13.2348	3.08284	1.62716	0.659128	0.506102	0.295548	1.28132	0.963923	0.000147153	0.127879	3.85454e-06
Bacteria;Firmicutes;Clostridia;Clostridiales;Ruminococcaceae;Sporobacter	0.00973534	0.00342356	0.0224453	0.00530279	0.0247711	0.00833594	0.125035	0.0484768	0.131744	0.0385138	0.0585397	0.0182197	0.000316404	0.0970274	0.0347366
Bacteria;Firmicutes;Bacilli;Lactobacillales;Carnobacteriaceae;Granulicatella	0	0	0	0	0	0	0.00054005	0.00054005	0.000959693	0.000959693	0.00651543	0.00198156	0.000328792	0.000181265	7.46504e-05
Bacteria;Fusobacteria;Fusobacteria;Fusobacteriales;Fusobacteriaceae;Other	1.02193	0.356565	0.890944	0.222331	1.29772	0.35988	2.47908	0.444671	2.04297	0.868476	1.61305	0.512535	0.00035934	0.604734	0.458078
Bacteria;Bacteroidetes;Bacteroidia;Bacteroidales;Prevotellaceae;Prevotella	7.70367	3.38691	5.80704	3.42299	8.18268	3.5839	0.00245105	0.00177935	0	0	0.016348	0.0108856	0.000872223	0.738246	0.867459
Bacteria;Bacteroidetes;Bacteroidia;Bacteroidales;Prevotellaceae;Xylanibacter	0.0222972	0.00933495	0.0131521	0.00637978	0.0210956	0.00993389	0.00054005	0.00054005	0	0	0.00048662	0.00048662	0.00111649	0.87415	0.685046
Bacteria;Firmicutes;Bacilli;Lactobacillales;Lactobacillaceae;Pediococcus	0	0	0	0	0	0	0	0	0	0	0.0112832	0.00362615	0.00157267	5.28991e-05	1.67192e-05
Bacteria;Bacteroidetes;Bacteroidia;Bacteroidales;Porphyromonadaceae;Parabacteroides	0.000501223	0.000501223	0	0	0	0	0.306944	0.189258	0.37562	0.131688	0.382496	0.204346	0.00169668	0.244967	0.216782
Bacteria;Actinobacteria;Actinobacteria;Actinomycetales;Actinomycetaceae;Actinomyces	0	0	0	0	0.000871262	0.000871262	0.00957784	0.0040339	0.00601967	0.00387251	0.00583821	0.00304651	0.00169985	0.232399	0.101785
Bacteria;Firmicutes;Clostridia;Clostridiales;Eubacteriaceae;Other	0	0	0	0	0	0	0.00898839	0.00449691	0.00506276	0.00388987	0.00695235	0.00347703	0.00188124	0.199513	0.196516
Bacteria;Firmicutes;Erysipelotrichi;Erysipelotrichales;Erysipelotrichaceae;Holdemania	0.0153008	0.0066487	0.0231309	0.00673714	0.0144159	0.00386546	0.0660371	0.0203222	0.050978	0.0082003	0.0468986	0.0243219	0.00231935	0.0333589	0.282132
Bacteria;Fusobacteria;Fusobacteria;Fusobacteriales;Fusobacteriaceae;Cetobacterium	0.0299327	0.0160898	0.0371903	0.015723	0.0352349	0.0149342	0.0811333	0.0232533	0.0719451	0.0414993	0.0721786	0.0301929	0.00257211	0.938075	0.965083
Bacteria;Firmicutes;Bacilli;Lactobacillales;Streptococcaceae;Lactococcus	0	0	0	0	0.000467552	0.000467552	0.0859254	0.0411682	1.24735	0.743593	0.452949	0.164174	0.00285084	0.0103896	0.00134537
Bacteria;Firmicutes;Clostridia;Clostridiales;Veillonellaceae;Megamonas	0.987471	0.275241	0.915049	0.188218	2.03804	0.730726	0.116176	0.0468863	0.176661	0.125742	0.417794	0.153197	0.00345725	0.0964894	0.528132
Bacteria;Firmicutes;Erysipelotrichi;Erysipelotrichales;Erysipelotrichaceae;Catenibacterium	0.859396	0.36785	0.390311	0.301108	0.891957	0.743764	0.0116012	0.00374879	0.00468349	0.00166185	0.00489925	0.00185125	0.00450603	0.0783888	0.536926
Bacteria;Firmicutes;Bacilli;Lactobacillales;Other;Other	0.000501223	0.000501223	0.000660611	0.000660611	0.00129233	0.000633926	0.028744	0.00968913	0.356427	0.209526	0.977154	0.414593	0.00481518	0.0293957	0.00483059
Bacteria;Firmicutes;Bacilli;Other;Other;Other	0	0	0	0	0	0	0.000988103	0.000988103	0.0193182	0.00717358	0.0174596	0.00685027	0.00489508	0.00820938	0.00276297
Bacteria;Firmicutes;Bacilli;Lactobacillales;Enterococcaceae;Enterococcus	0.000382193	0.000382193	0	0	0	0	0.0210797	0.00597062	0.054479	0.0408133	0.105835	0.0387416	0.00527585	0.125679	0.00193905
Bacteria;Actinobacteria;Actinobacteria;Bifidobacteriales;Bifidobacteriaceae;Other	0	0	0	0	0	0	0	0	0.0145354	0.00193737	0.00713107	0.00285621	0.00631447	0.000799595	0.00801568
Bacteria;Actinobacteria;Actinobacteria;Bifidobacteriales;Bifidobacteriaceae;Bifidobacterium	0.000382193	0.000382193	0	0	0	0	0	0	0.0406696	0.0170937	0.0272853	0.00971972	0.00649314	0.00111237	0.00725602
Bacteria;Firmicutes;Bacilli;Lactobacillales;Carnobacteriaceae;Other	0	0	0	0	0	0	0.00693428	0.00316851	0.00712585	0.0054568	0.00832137	0.00607183	0.00660189	0.50505	0.349868
Bacteria;Firmicutes;Clostridia;Clostridiales;Peptostreptococcaceae;Sporacetigenium	0.610641	0.200406	0.201428	0.0589952	0.204099	0.0695673	0.393125	0.135672	0.382455	0.143023	0.951189	0.101159	0.00786501	0.255001	0.00441738
Bacteria;Firmicutes;Bacilli;Lactobacillales;Enterococcaceae;Other	0	0	0	0	0.0003836	0.0003836	0.00136467	0.00089491	0.00520646	0.0036203	0.0156456	0.00589414	0.00879033	0.0217914	0.00249667
Bacteria;Proteobacteria;Gammaproteobacteria;Aeromonadales;Succinivibrionaceae;Succinivibrio	0.735004	0.383726	0.277917	0.144412	0.487268	0.315144	0.000498425	0.000498425	0.00136769	0.00136769	0.00048662	0.00048662	0.00936419	0.35351	0.329676
Bacteria;Firmicutes;Erysipelotrichi;Erysipelotrichales;Erysipelotrichaceae;Turicibacter	0.75821	0.280026	1.31469	0.451529	0.957078	0.322383	0.00208238	0.00105404	0.00407156	0.00259155	0.00415025	0.00361451	0.00955221	0.369161	0.00970955
Bacteria;Firmicutes;Clostridia;Clostridiales;Veillonellaceae;Other	0.653828	0.211696	0.715296	0.104611	0.88437	0.174065	0.233292	0.12845	0.122559	0.0416505	0.100947	0.0381173	0.0110804	1.48264e-05	0.00391547
Bacteria;Firmicutes;Clostridia;Clostridiales;Peptostreptococcaceae;Peptostreptococcus	36.6885	4.74837	28.2794	4.74765	25.7395	3.31397	28.3221	1.86262	22.6069	3.39458	21.6996	3.4362	0.011624	5.00121e-05	0.924989
Bacteria;Other;Other;Other;Other;Other	1.14747	0.195811	1.179	0.0962463	1.18169	0.111519	0.874933	0.187097	0.638034	0.149506	0.436971	0.122988	0.0120415	0.481725	0.00729992
Bacteria;Firmicutes;Bacilli;Lactobacillales;Carnobacteriaceae;Carnobacterium	0	0	0	0	0	0	0.00054005	0.00054005	0.000959693	0.000959693	0.00297917	0.00155097	0.013983	0.0896934	0.0694242
Bacteria;Firmicutes;Clostridia;Clostridiales;Ruminococcaceae;Lactonifactor	0.0194127	0.0034029	0.0111279	0.00201986	0.0182722	0.00397764	0.0131424	0.00129462	0.0129703	0.00485145	0.0144175	0.0040963	0.0149061	0.106982	0.134806
Bacteria;Firmicutes;Clostridia;Clostridiales;Ruminococcaceae;Ruminococcus	0.0695389	0.0141356	0.0723014	0.00515548	0.0819313	0.0352776	0.0427187	0.0110436	0.0369823	0.0189231	0.0219821	0.00627373	0.0159719	0.336284	0.28803
Bacteria;Proteobacteria;Betaproteobacteria;Burkholderiales;Other;Other	0.0297692	0.0154353	0.0196271	0.00503893	0.0360273	0.0130259	0.0200766	0.00802385	0.00273538	0.00273538	0.0386165	0.0194269	0.0160623	0.025354	0.00017855
Bacteria;Firmicutes;Clostridia;Clostridiales;Ruminococcaceae;Acetanaerobacterium	0.00230326	0.00152462	0.000660611	0.000660611	0.00143181	0.000975328	0.00411671	0.00176683	0.00519071	0.00361995	0.00464884	0.00244579	0.0171502	0.361759	0.806114
Bacteria;Firmicutes;Other;Other;Other;Other	0.915259	0.0883097	1.09621	0.153114	0.778819	0.163601	0.48395	0.0788482	0.995632	0.276576	0.799096	0.195273	0.0178383	0.00345344	0.28945
Bacteria;Firmicutes;Bacilli;Lactobacillales;Lactobacillaceae;Other	0	0	0.00047238	0.00047238	0	0	0.00206452	0.00161761	0.0617762	0.0434322	1.4904	0.767401	0.0194602	0.0357284	0.0182356
Bacteria;Firmicutes;Bacilli;Lactobacillales;Lactobacillaceae;Lactobacillus	0	0	0.00255013	0.00189489	0.00535219	0.00382955	0.0105543	0.00634702	0.58713	0.323425	14.8769	7.77686	0.0266708	0.0332889	0.0178278
Bacteria;Firmicutes;Clostridia;Clostridiales;Incertae Sedis XIII;Anaerovorax	0.00804472	0.00449074	0.00597048	0.00305133	0.00322049	0.00228244	0.0303916	0.0274498	0.0283907	0.0283907	0.0349738	0.0250038	0.0325458	0.974607	0.980543
Bacteria;Bacteroidetes;Bacteroidia;Bacteroidales;Porphyromonadaceae;Porphyromonas	0	0	0	0	0.00177101	0.000951358	0.00573493	0.00573493	0.0108155	0.0108155	0.0133031	0.00859242	0.0395567	0.334718	0.491049
Bacteria;Firmicutes;Clostridia;Clostridiales;Lachnospiraceae;Dorea	0.206008	0.0912651	0.135694	0.0425952	0.168337	0.0693161	0.447165	0.110809	0.457385	0.131637	0.443601	0.119654	0.0427196	0.941633	0.00784135
Bacteria;Firmicutes;Clostridia;Clostridiales;Peptostreptococcaceae;Tepidibacter	0.00345747	0.00091363	0	0	0.00129987	0.000869942	0.00900483	0.0045826	0.0191939	0.0191939	0.00404413	0.00191522	0.044614	0.518906	0.261667
Bacteria;Firmicutes;Bacilli;Bacillales;Bacillales_incertae_sedis;Solibacillus	0	0	0	0	0	0	0	0	0	0	0	0	0.0529756	0.0470236	0.0402712
Bacteria;Actinobacteria;Actinobacteria;Actinomycetales;Streptosporangiaceae;Streptosporangium	0	0	0	0	0	0	0	0	0	0	0	0	0.0568313	0.052347	0.0450427
Bacteria;Proteobacteria;Betaproteobacteria;Other;Other;Other	0.0254047	0.0157579	0.0192024	0.00404783	0.0583574	0.0227903	0.0075922	0.00384974	0.0142286	0.0118089	0.0421367	0.0216161	0.0686825	0.004146	0.000286978
Bacteria;Firmicutes;Bacilli;Lactobacillales;Streptococcaceae;Other	0	0	0	0	0	0	0.00470628	0.00189901	0.159982	0.0888499	0.0187694	0.0129272	0.0804994	0.0175295	0.000105363
Bacteria;Firmicutes;Bacilli;Bacillales;Planococcaceae;Sporosarcina	0	0	0	0	0	0	0.000988103	0.000988103	0.00959693	0.00959693	0	0	0.084144	0.000617138	0.306666
Bacteria;Firmicutes;Bacilli;Bacillales;Planococcaceae;Other	0	0	0	0	0	0	0.00148215	0.00148215	0.00671785	0.00671785	0	0	0.094458	0.000430485	0.551969
Bacteria;Firmicutes;Bacilli;Bacillales;Paenibacillaceae;Ammoniphilus	0	0	0	0	0	0	0.000494052	0.000494052	0.000959693	0.000959693	0	0	0.101235	0.00824962	0.64098
Bacteria;Firmicutes;Bacilli;Bacillales;Bacillaceae;Lysinibacillus	0	0	0	0	0	0	0.00148215	0.00148215	0.00479846	0.00479846	0	0	0.120979	0.00126608	0.729852
Bacteria;Actinobacteria;Actinobacteria;Acidimicrobiales;Acidimicrobiaceae;Other	0	0	0	0	0	0	0	0	0.000959693	0.000959693	0	0	0.123492	0.0124871	0.27178
Bacteria;Bacteroidetes;Bacteroidia;Bacteroidales;Other;Other	1.29048	0.486748	2.30552	1.03077	3.50401	1.06929	2.34402	1.21099	2.63183	1.72577	0.643402	0.313105	0.129	0.000488425	0.00997442
Bacteria;Firmicutes;Clostridia;Clostridiales;Peptostreptococcaceae;Filifactor	0.0338624	0.0101952	0.0197145	0.00565983	0.0357333	0.011721	0.0584701	0.0153105	0.0242188	0.0110847	0.0419007	0.0236311	0.134331	0.0209393	0.842157
Bacteria;Firmicutes;Bacilli;Bacillales;Bacillaceae;Other	0	0	0	0	0	0	0.00148215	0.00148215	0.00671785	0.00671785	0.00048662	0.00048662	0.143058	0.000334968	0.412991
Bacteria;Firmicutes;Bacilli;Bacillales;Other;Other	0.000433606	0.000433606	0.00116215	0.00116215	0.000441182	0.000441182	0.0160203	0.011914	0.0537428	0.0537428	0.00287149	0.00144998	0.143608	0.000895752	0.662149
Bacteria;Firmicutes;Bacilli;Bacillales;Bacillaceae;Bacillus	0.000815799	0.000535478	0	0	0	0	0.011341	0.0108118	0.029183	0.0274101	0.00167556	0.00122997	0.14413	0.00123978	0.614349
Bacteria;Proteobacteria;Alphaproteobacteria;Rhodospirillales;Other;Other	0	0	0	0	0	0	0	0	0	0	0	0	0.147637	0.00473955	0.0883269
Bacteria;Bacteria_incertae_sedis;Ktedonobacteria;Ktedonobacterales;Ktedonobacteraceae;Ktedonobacter	0	0	0	0	0	0	0.00296431	0.00296431	0.00287908	0.00287908	0	0	0.170264	0.0251216	0.819218
Bacteria;Actinobacteria;Actinobacteria;Actinomycetales;Streptomycetaceae;Streptomyces	0	0	0	0	0	0	0.000988103	0.000988103	0.00287908	0.00287908	0	0	0.183814	0.0258997	0.689793
Bacteria;Firmicutes;Erysipelotrichi;Erysipelotrichales;Erysipelotrichaceae;Coprobacillus	0.110039	0.0248414	0.222785	0.0488247	0.164041	0.0303886	0.0962414	0.0394358	0.181515	0.0409667	0.0437414	0.0133465	0.187191	0.000568225	0.59752
Bacteria;Firmicutes;Clostridia;Clostridiales;Veillonellaceae;Pelosinus	0	0	0	0	0	0	0.000494052	0.000494052	0	0	0	0	0.197415	0.0320662	0.069581
Bacteria;Firmicutes;Clostridia;Clostridiales;Incertae Sedis XIV;Blautia	5.90506	0.602006	5.75802	0.429757	5.55683	0.947155	9.10694	0.802819	5.51359	0.500056	6.92133	1.32812	0.205474	1.55041e-05	2.7588e-05
Bacteria;Actinobacteria;Actinobacteria;Coriobacteriales;Coriobacteriaceae;Denitrobacterium	0	0	0	0	0	0	0	0	0.00135194	0.00135194	0	0	0.25611	0.154175	0.043743
Bacteria;Firmicutes;Bacilli;Bacillales;Thermoactinomycetaceae;Other	0	0	0	0	0	0	0	0	0.000959693	0.000959693	0	0	0.25611	0.154175	0.043743
Bacteria;Firmicutes;Bacilli;Lactobacillales;Carnobacteriaceae;Isobaculum	0	0	0	0	0	0	0	0	0.000959693	0.000959693	0	0	0.25611	0.154175	0.043743
Bacteria;Firmicutes;Bacilli;Lactobacillales;Leuconostocaceae;Leuconostoc	0	0	0	0	0	0	0	0	0.000959693	0.000959693	0	0	0.25611	0.154175	0.043743
Bacteria;Firmicutes;Clostridia;Clostridiales;Incertae Sedis XI;Parvimonas	0	0	0	0	0	0	0	0	0.00136769	0.00136769	0	0	0.25611	0.154175	0.043743
Bacteria;Proteobacteria;Deltaproteobacteria;Myxococcales;Haliangiaceae;Haliangium	0	0	0	0	0	0	0	0	0.000959693	0.000959693	0	0	0.25611	0.154175	0.043743
Bacteria;Actinobacteria;Actinobacteria;Actinomycetales;Catenulisporaceae;Catenulispora	0	0	0	0	0	0	0	0	0	0	0	0	0.268709	0.0105379	0.495479
Bacteria;Proteobacteria;Betaproteobacteria;Burkholderiales;Alcaligenaceae;Sutterella	0.312555	0.10508	0.31315	0.070281	0.46643	0.182461	0.100344	0.0261938	0.140972	0.114612	0.261926	0.175768	0.299947	0.00280681	0.000194819
Bacteria;Bacteroidetes;Bacteroidia;Bacteroidales;Prevotellaceae;Paraprevotella	0.0087543	0.00358716	0.0129903	0.0047142	0.0198959	0.00963395	0.0242458	0.0219606	0.00191939	0.00191939	0.00194648	0.00194648	0.313887	0.00184308	0.380184
Bacteria;Proteobacteria;Alphaproteobacteria;Rhizobiales;Hyphomicrobiaceae;Hyphomicrobium	0	0	0	0	0	0	0	0	0	0	0	0	0.32311	0.000200166	0.29988
Bacteria;Proteobacteria;Alphaproteobacteria;Rhizobiales;Hyphomicrobiaceae;Other	0	0	0	0	0	0	0.000471858	0.000471858	0.000959693	0.000959693	0	0	0.333317	0.00240675	0.763555
Bacteria;Firmicutes;Clostridia;Clostridiales;Ruminococcaceae;Acetivibrio	0	0	0	0	0	0	0.000494052	0.000494052	0	0	0	0	0.35068	0.000114053	0.926887
Bacteria;Acidobacteria;Acidobacteria_Gp3;Gp3;Other;Other	0	0	0	0	0	0	0	0	0	0	0	0	0.369381	0.0468415	0.43995
Bacteria;Actinobacteria;Actinobacteria;Actinomycetales;Nakamurellaceae;Humicoccus	0	0	0	0	0	0	0.000494052	0.000494052	0	0	0	0	0.385508	0.0056712	0.250982
Bacteria;Actinobacteria;Actinobacteria;Solirubrobacterales;Other;Other	0	0	0	0	0	0	0.00592862	0.00592862	0.00383877	0.00383877	0	0	0.387177	0.0101525	0.973241
Bacteria;Proteobacteria;Alphaproteobacteria;Rhizobiales;Other;Other	0	0	0	0	0	0	0.00395241	0.00395241	0.000959693	0.000959693	0	0	0.40168	0.012068	0.35535
Bacteria;Firmicutes;Bacilli;Bacillales;Paenibacillaceae;Paenibacillus	0	0	0	0	0	0	0	0	0.00287908	0.00287908	0.00129072	0.00129072	0.401694	0.00113613	0.968738
Bacteria;Verrucomicrobia;Spartobacteria;Spartobacteria_genera_incertae_sedis;Other;Other	0	0	0	0	0	0	0.00192652	0.00148528	0.000959693	0.000959693	0	0	0.426478	0.0477247	0.403666
Bacteria;Actinobacteria;Actinobacteria;Other;Other;Other	0.000382193	0.000382193	0	0	0	0	0.010457	0.00870175	0.0134357	0.0134357	0.000454351	0.000454351	0.427209	0.0103676	0.981906
Bacteria;Actinobacteria;Actinobacteria;Actinomycetales;Streptosporangiaceae;Microbispora	0	0	0	0	0	0	0	0	0	0	0	0	0.455733	0.0492613	0.79641
Bacteria;Firmicutes;Bacilli;Bacillales;Bacillaceae;Geobacillus	0	0	0	0	0	0	0	0	0	0	0	0	0.461621	0.0490729	0.804066
Bacteria;Actinobacteria;Actinobacteria;Actinomycetales;Micromonosporaceae;Dactylosporangium	0	0	0	0	0	0	0	0	0	0	0	0	0.471484	0.0470649	0.603128
Bacteria;Proteobacteria;Alphaproteobacteria;Rhizobiales;Xanthobacteraceae;Pseudolabrys	0	0	0	0	0	0	0	0	0.000959693	0.000959693	0	0	0.474134	0.00192028	0.933508
Bacteria;Proteobacteria;Gammaproteobacteria;Enterobacteriales;Enterobacteriaceae;Escherichia/Shigella	0.010679	0.00641073	0.0613311	0.0523101	0.0427471	0.030194	0.0734428	0.0231564	0.174517	0.158143	0.0352237	0.0198113	0.499362	1.53975e-05	0.989614
Bacteria;Proteobacteria;Alphaproteobacteria;Other;Other;Other	0	0	0	0	0	0	0	0	0	0	0	0	0.507634	0.0472916	0.858069
Bacteria;Proteobacteria;Alphaproteobacteria;Rhizobiales;Bradyrhizobiaceae;Other	0	0	0	0	0	0	0.000988103	0.000988103	0	0	0	0	0.529299	0.0121772	0.183171
Bacteria;Bacteroidetes;Other;Other;Other;Other	0.0588094	0.0221666	0.0750644	0.0342251	0.124482	0.035976	0.0808699	0.0531449	0.0679453	0.0459369	0.0199623	0.00844189	0.534412	0.103138	0.0200343
Bacteria;Proteobacteria;Alphaproteobacteria;Rhizobiales;Hyphomicrobiaceae;Pedomicrobium	0	0	0	0	0	0	0	0	0	0	0	0	0.554067	0.0432016	0.718691
Bacteria;Firmicutes;Bacilli;Bacillales;Paenibacillaceae;Other	0.000412623	0.000412623	0	0	0	0	0	0	0.000959693	0.000959693	0	0	0.556636	0.0201237	0.826877
Bacteria;Actinobacteria;Actinobacteria;Solirubrobacterales;Solirubrobacteraceae;Solirubrobacter	0	0	0	0	0	0	0.00148215	0.00148215	0	0	0	0	0.559766	0.0455168	0.981131
Bacteria;Proteobacteria;Alphaproteobacteria;Rhizobiales;Bradyrhizobiaceae;Bradyrhizobium	0	0	0	0	0	0	0.00197621	0.00197621	0.000959693	0.000959693	0	0	0.565121	0.0126061	0.988739
Bacteria;Acidobacteria;Acidobacteria_Gp1;Gp1;Other;Other	0	0	0	0	0	0	0	0	0.000959693	0.000959693	0	0	0.570825	0.253822	0.0439911
Bacteria;Planctomycetes;Planctomycetacia;Planctomycetales;Planctomycetaceae;Singulisphaera	0	0	0	0	0	0	0.00597462	0.00538402	0.00287908	0.00287908	0	0	0.585744	8.2971e-06	0.0482252
Bacteria;Proteobacteria;Gammaproteobacteria;Enterobacteriales;Enterobacteriaceae;Other	0.0213249	0.0165441	0.0673221	0.048693	0.0742994	0.0524704	0.127426	0.036638	0.272857	0.217472	0.0554168	0.0261198	0.586577	1.68322e-05	0.989386
Bacteria;Proteobacteria;Epsilonproteobacteria;Campylobacterales;Helicobacteraceae;Other	0	0	0.00505173	0.00252168	0.000882363	0.000882363	0	0	0.00383877	0.00383877	0.000973241	0.000973241	0.627134	0.00361199	0.937469
Bacteria;Proteobacteria;Deltaproteobacteria;Myxococcales;Polyangiaceae;Byssovorax	0	0	0	0	0	0	0	0	0	0	0	0	0.646524	0.00510846	0.972019
Bacteria;Proteobacteria;Deltaproteobacteria;Myxococcales;Polyangiaceae;Other	0	0	0	0	0	0	0	0	0	0	0	0	0.665796	0.0020473	0.80989
Bacteria;Firmicutes;Bacilli;Lactobacillales;Streptococcaceae;Streptococcus	0.000927272	0.00060839	0.000581074	0.000581074	0.000935104	0.000935104	0.0252639	0.0147006	2.85694	1.03946	1.42636	0.843964	0.68425	0.00953909	0.00791826
Bacteria;Planctomycetes;Planctomycetacia;Planctomycetales;Planctomycetaceae;Other	0	0	0	0	0	0	0.000988103	0.000988103	0	0	0	0	0.692292	0.00152313	0.524943
Bacteria;Actinobacteria;Actinobacteria;Solirubrobacterales;Conexibacteraceae;Conexibacter	0	0	0	0	0	0	0.00296431	0.00296431	0.00287908	0.00287908	0	0	0.70077	0.000370759	0.214004
Bacteria;Actinobacteria;Actinobacteria;Acidimicrobiales;Other;Other	0	0	0	0	0	0	0	0	0	0	0	0	0.701753	6.79669e-05	0.811827
Bacteria;Bacteroidetes;Bacteroidia;Bacteroidales;Prevotellaceae;Other	0.39452	0.141782	0.481903	0.196853	0.743181	0.211511	0.350309	0.179295	0.458472	0.305007	0.110226	0.0525012	0.709692	0.00462189	0.0488534
Bacteria;Actinobacteria;Actinobacteria;Actinomycetales;Streptomycetaceae;Kitasatospora	0	0	0	0	0	0	0.000494052	0.000494052	0	0	0	0	0.726123	0.0181436	0.998281
Bacteria;Actinobacteria;Actinobacteria;Actinomycetales;Micromonosporaceae;Rugosimonospora	0	0	0	0	0	0	0.000494052	0.000494052	0	0	0	0	0.732719	0.00516918	0.967545
Bacteria;Actinobacteria;Actinobacteria;Actinomycetales;Other;Other	0.000490408	0.000490408	0	0	0	0	0.0200759	0.0107635	0.00617264	0.00326654	0.00247212	0.00131914	0.744911	0.000255288	0.382318
Bacteria;Chloroflexi;Thermomicrobia;Other;Other;Other	0	0	0	0	0	0	0	0	0	0	0	0	0.746104	0.0253957	0.906989
Bacteria;Actinobacteria;Actinobacteria;Actinomycetales;Thermomonosporaceae;Actinoallomurus	0	0	0	0	0	0	0.00494052	0.00494052	0.00767754	0.00767754	0	0	0.828536	0.00139327	0.279958
Bacteria;Actinobacteria;Actinobacteria;Actinomycetales;Micromonosporaceae;Other	0	0	0	0	0	0	0.00399841	0.0034232	0	0	0	0	0.832428	0.00563982	0.898705
Bacteria;Firmicutes;Clostridia;Clostridiales;Peptococcaceae;Desulfosporosinus	0	0	0	0	0	0	0	0	0	0	0	0	0.896287	0.0124322	0.999995
Bacteria;Actinobacteria;Actinobacteria;Actinomycetales;Intrasporangiaceae;Janibacter	0	0	0	0	0	0	0	0	0	0	0	0	0.907036	0.0122351	0.980113
Bacteria;Actinobacteria;Actinobacteria;Actinomycetales;Nocardioidaceae;Nocardioides	0	0	0	0	0	0	0.00262401	0.00198979	0.000959693	0.000959693	0	0	0.918436	0.0159744	0.864624
Bacteria;Actinobacteria;Actinobacteria;Actinomycetales;Pseudonocardiaceae;Pseudonocardia	0	0	0	0	0	0	0	0	0	0	0	0	0.933004	0.0141712	0.999741
Bacteria;Proteobacteria;Alphaproteobacteria;Rhodospirillales;Acetobacteraceae;Other	0	0	0	0	0	0	0	0	0	0	0	0	0.953022	0.0030222	0.998482
Bacteria;Actinobacteria;Actinobacteria;Actinomycetales;Thermomonosporaceae;Other	0	0	0	0	0	0	0.00247026	0.00247026	0.00287908	0.00287908	0	0	0.955699	9.37024e-05	0.554374
Bacteria;Actinobacteria;Actinobacteria;Actinomycetales;Intrasporangiaceae;Other	0	0	0	0	0	0	0.00543457	0.00543457	0.00191939	0.00191939	0	0	0.981283	0.0324705	0.234353
Bacteria;Proteobacteria;Gammaproteobacteria;Other;Other;Other	0.000412623	0.000412623	0.00429311	0.00299134	0	0	0.00242184	0.00162086	0.00575816	0.00575816	0.000940972	0.000607894	0.992533	0.0206119	0.772105

## Sheet: Supplementary data 3 Family
	Kibble						Meat
	3		6		9		3		6		9		P-value
Family	Mean	SEM	Mean	SEM	Mean	SEM	Mean	SEM	Mean	SEM	Mean	SEM	Diet	Time	Diet*Week
F_Alcaligenaceae	0.3	0.1	0.3	0.1	0.5	0.2	0.1	0	0.2	0.1	0.3	0.2	0.142		0.74
F_Anaeroplasmataceae	0	0	0	0	0	0	0	0	0	0	0	0	0.69		0.364
F_Bacillaceae	0	0	0	0	0	0	0	0	0.1	0.1	0	0	0.055		0.172
F_Bacteroidaceae	6.5	1.4	13.8	1.8	13.2	3.1	1.6	0.8	0.7	0.4	1.5	1.1	0		0.063
F_Bifidobacteriaceae	0	0	0	0	0	0	0	0	0.1	0	0	0	0		0.001
F_Carnobacteriaceae	0	0	0	0	0	0	0	0	0	0	0	0	0.003		0.272
F_Clostridiaceae	0.4	0.2	0.2	0.1	0.1	0	6.1	1.7	13.5	4.5	9.1	2.7	0		0.106
F_Clostridiales_Incertae Sedis XIII	0	0	0	0	0	0	0.1	0.1	0.1	0	0.2	0.1	0.043		0.674
F_Clostridiales_Incertae Sedis XIV	5.9	0.6	5.8	0.4	5.6	0.9	8.9	0.9	5.3	0.6	7.5	1.4	0.012		0.284
F_Coriobacteriaceae	1	0.2	0.6	0.2	0.8	0.2	5.4	1.2	2	0.9	3.4	0.4	0		0.026
F_Desulfovibrionaceae	0	0	0	0	0	0	0.3	0.2	0	0	0.1	0	0.037		0.332
F_Enterobacteriaceae	0	0	0.1	0.1	0.1	0.1	0.2	0.1	0.6	0.5	0.1	0.1	0.116		0.219
F_Enterococcaceae	0	0	0	0	0	0	0	0	0.1	0.1	0.1	0	0.002		0.117
F_Erysipelotrichaceae	3.6	0.6	3.5	0.6	3.4	0.9	0.6	0.1	1.2	0.4	0.4	0.1	0		0.947
F_Eubacteriaceae	0.2	0.1	0.4	0.1	0.3	0.1	0	0	0.1	0	0	0	0.001		0.491
F_Fusobacteriaceae	5	1.7	4.6	1.2	8	2.1	18	3.3	19.6	7.5	14.7	3.6	0		0.68
F_Helicobacteraceae	0	0	0	0	0	0	0	0	0	0	0	0	0.946		0.136
F_Lachnospiraceae	2.8	0.2	2.6	0.2	3	0.5	4.1	0.7	4.6	0.8	3.7	0.8	0.007		0.839
F_Lactobacillaceae	0	0	0	0	0	0	0	0	0.6	0.5	11.3	8.2	0.094		0.13
F_Leuconostocaceae	0	0	0	0	0	0	0	0	0	0	0	0	0.01		0.013
F_Microbacteriaceae	0	0	0	0	0	0	0	0	0	0	0	0	0.021		0.527
F_Micrococcaceae	0	0	0	0	0	0	0	0	0	0	0	0	0.066		0.94
F_Moraxellaceae	0	0	0	0	0	0	0	0	0	0	0	0	0.376		0.51
F_Paenibacillaceae	0	0	0	0	0	0	0	0	0	0	0	0	0.082		0.146
F_Peptococcaceae	0.6	0.3	0.3	0.1	0.6	0.2	2.1	0.5	2.1	1.2	1.5	0.6	0		0.781
F_Peptostreptococcaceae	40.9	5.3	30.5	4.9	27.8	3.4	30.8	1.4	22.9	2.3	27.1	3.3	0.135		0.113
F_Porphyromonadaceae	0.2	0.2	0.2	0.1	0.3	0.2	0.7	0.4	0.7	0.2	0.5	0.3	0.077		0.986
F_Pseudonocardiaceae	0	0	0	0	0	0	0	0	0	0	0	0	0.123		0.951
F_Ruminococcaceae	5.8	1.5	12.4	2.7	7.1	1.8	2.2	0.3	2.1	0.2	1.5	0.4	0		0.067
F_Streptococcaceae	0	0	0	0	0	0	0.1	0	4	2.6	2	1.1	0.003		0.011
F_Succinivibrionaceae	0.8	0.4	0.3	0.1	0.6	0.4	0	0	0	0	0	0	0.032		0.808
F_Unclassified_Actinobacteria	0	0	0	0	0	0	0	0	0	0	0	0	0.058		0.425
F_Unclassified_Actinomycetales	0	0	0	0	0	0	0	0	0	0	0	0	0.018		0.244
F_Unclassified_Bacillales	0	0	0	0	0	0	0	0	0.1	0.1	0	0	0.061		0.103
F_Unclassified_Bacilli	0	0	0	0	0	0	0	0	0	0	0	0	0		0.002
F_Unclassified_Bacteria	1.1	0.2	1.2	0.1	1.2	0.1	0.9	0.2	0.7	0.2	0.5	0.1	0.002		0.565
F_Unclassified_Bacteroidales	1.3	0.5	2.3	1	3.5	1.1	2.6	1.4	3.5	2.1	0.7	0.4	0.745		0.253
F_Unclassified_Bacteroidetes	0.1	0	0.1	0	0.1	0	0.1	0.1	0.1	0.1	0	0	0.519		0.467
F_Unclassified_Betaproteobacteria	0	0	0	0	0.1	0	0	0	0	0	0	0	0.524		0.197
F_Unclassified_Burkholderiales	0	0	0	0	0	0	0	0	0	0	0	0	0.851		0.479
F_Unclassified_Clostridia	0	0	0	0	0	0	0	0	0	0	0	0	0.037		0.236
F_Unclassified_Clostridiales	12.5	0.8	11.6	0.8	10.8	1.5	13.1	0.9	12.6	3.2	11.1	1.8	0.595		0.699
F_Unclassified_Desulfovibrionales	0	0	0	0	0	0	0.1	0.1	0	0	0	0	0.123		0.671
F_Unclassified_Firmicutes	0.9	0.1	1.1	0.2	0.8	0.2	0.5	0.1	1	0.4	0.7	0.2	0.051		0.23
F_Unclassified_Fusobacteriales	0	0	0	0	0	0	0	0	0	0	0	0	0.873		0.549
F_Unclassified_Gammaproteobacteria	0	0	0	0	0	0	0	0	0	0	0	0	0.348		0.206
F_Unclassified_Lactobacillales	0	0	0	0	0	0	0	0	0.4	0.3	0.7	0.4	0.01		0.059
F_Unclassified_Proteobacteria	0	0	0	0	0	0	0	0	0	0	0	0	0.308		0.609
F_Veillonellaceae	1.8	0.5	1.8	0.3	3.1	0.8	0.7	0.2	0.4	0.2	1	0.4	0.001		0.257
F_Prevotellaceae	8.1	3.5	6.3	3.5	9	3.6	0.4	0.2	0.6	0.4	0.1	0.1	0.005		0.976
